# Supplementary material
Source: MDPI journal article supplement (https://www.mdpi.com/2072-4292/13/18/3615)
Supplement: s1 [file s1 › remotesensing-1288012-supplementary.pdf]

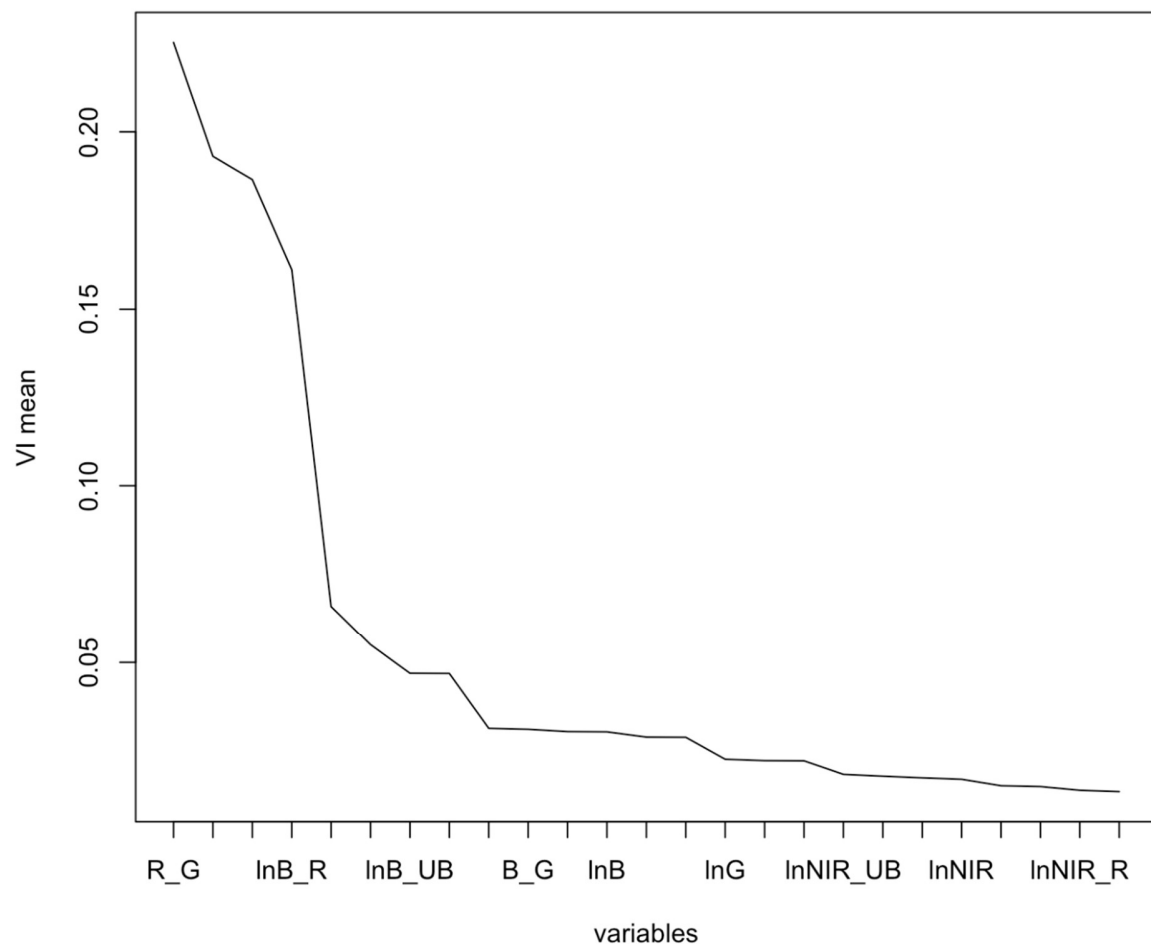

**Figure S1.** Variable importance as identified by random forest using VSURF.

**Table S1.** No meaningful improvement in model fit when narrower time windows were considered.

| <i>Time Window</i> | <i>Sample size</i> | <i>RMSE</i> | <i>MAE</i> | <i>Bias</i> | <i>Adj. R2</i> |
|--------------------|--------------------|-------------|------------|-------------|----------------|
| <i>One Day</i>     | 17                 | 0.72        | 0.62       | 0.18        | 0.48           |
| <i>Three Days</i>  | 50                 | 0.72        | 0.56       | 0.23        | 0.41           |
| <i>Seven Days</i>  | 101                | 0.73        | 0.55       | 0.27        | 0.44           |
| <i>Thirty Days</i> | 233                | 0.73        | 0.55       | 0.31        | 0.45           |
